# Supplementary material for: The insertion/deletion polymorphism rs201494641 at ITGA9 influences blood CD34+ cell levels by altering ZNF384 binding
Source: PubMed Central journal article supplement — Haematologica. 2024 May 9;109(9):3059–62. doi: 10.3324/haematol.2024.285363 (PMC11367236; doi:10.3324/haematol.2024.285363), 2024-05-09
Supplement: 2024_285363_CAFARO_SUPPL.pdf [file 2024_285363_CAFARO_SUPPL.pdf]

# The insertion/deletion polymorphism rs201494641 at *ITGA9* influences blood CD34<sup>+</sup> cell levels by altering ZNF384 binding

## Authors

---

Caterina Cafaro,<sup>1,2</sup> Zain Ali,<sup>1,2</sup> Antton Lamarca,<sup>1,2</sup> Daniela Torres Di Bello,<sup>1,2</sup> Laura Duran Lozano,<sup>1,2</sup> Ludvig Ekdahl,<sup>1,2</sup> Malte Thodberg,<sup>1,2</sup> Maroulio Pertesi,<sup>1,2</sup> Aitzkoa Lopez de Lapuente Portilla<sup>1,2</sup> and Björn Nilsson<sup>1,2,3</sup>

<sup>1</sup>Division of Hematology and Transfusion Medicine, Department of Laboratory Medicine, BMC B13, Lund University, Lund, Sweden;

<sup>2</sup>Lund Stem Cell Center, Lund University, Lund, Sweden and <sup>3</sup>Broad Institute, Cambridge, MA, USA

Correspondence:

B. NILSSON - [bjorn.nilsson@med.lu.se](mailto:bjorn.nilsson@med.lu.se)

<https://doi.org/10.3324/haematol.2024.285363>

## Supplementary Figure 1

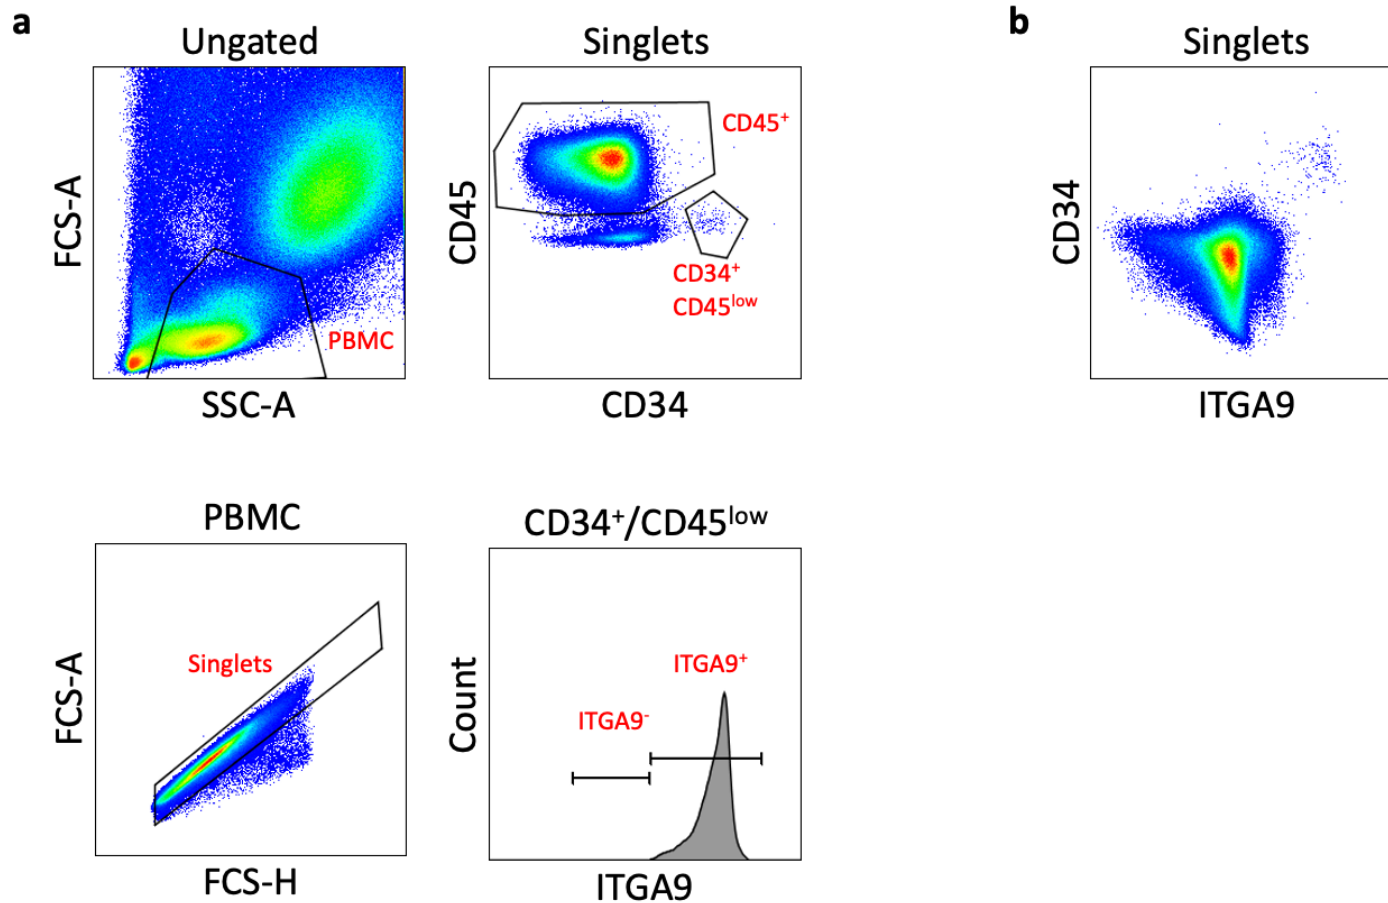

**(a)** Gating procedure. **Top left:** peripheral blood mononuclear cells (PBMCs) were gated based on forward scatter area (FSC-A) and side scatter area (SSC-A) from 1 million cells. **Bottom left:** from PBMCs, singlets cells were gated based on forward scatter area (FSC-A) and forward scatter height (FSC-H). **Top right:** from singlets, CD34<sup>+</sup>CD45<sup>low</sup> cells and CD45<sup>+</sup> cells were gated from the PBMCs cluster. **Bottom right:** ITGA9<sup>+</sup> cells were gated from the CD34<sup>+</sup>CD45<sup>low</sup> cluster. **(b)** Co-expression of ITGA9 and CD34 in PBMCs (*i.e.*, cells that express ITGA9 also express CD34 and vice versa).

## Supplementary Table 1

sgRNA and primer sequences used in CRISPR/Cas9 experiments.

| sgRNA(s) (+ strand)                                                             |                            | PAM |     | Strand |    | Primers for deletion confirmation            | Deletion size (bp) |
|---------------------------------------------------------------------------------|----------------------------|-----|-----|--------|----|----------------------------------------------|--------------------|
| 5'                                                                              | 3'                         | 5'  | 3'  | 5'     | 3' | Forward/reverse                              |                    |
| sgRNA pair for deleting <i>ITGA9</i> whole region<br>(chr3:37,477,598; "V1-V4") |                            |     |     |        |    |                                              |                    |
| CACCGATGAGAGAGTGAGAAGGGA                                                        | CACCGGTGTGAAAATGTTATTCTG   | AGG | AGG | -      | -  | CATGGACACTGTTGCACCTC<br>GACTCCCCTAAGAAGCTCCC | 486                |
| chr3:37,477,595-37,477,614                                                      | chr3:37,478,075-37,478,097 |     |     |        |    |                                              |                    |
| sgRNA pair for deleting random control region                                   |                            |     |     |        |    |                                              |                    |
| CACCGAAATTCCCGAAAAGCCTGGT                                                       | CACCGAAAGCACAGGCAGAAACTGT  | AGG | AGG | +      | +  | CCTGTTGCTGTGGCTACTGA<br>GCCAGGCTTGTGGGAAGTA  | 60                 |
| chr17:17,024,714-17,024,736                                                     | chr17:17024773-17024795    |     |     |        |    |                                              |                    |

## Supplementary Table 2

Reporter construct sequences used in luciferase experiments.

| Variant     | Sequence                                                                                                                                                                      |
|-------------|-------------------------------------------------------------------------------------------------------------------------------------------------------------------------------|
| rs73053290  | ATAGGTACCTTCCCCAGAAACAAATGATACTGGATGTAAAGATAGCATCAGGATTAGAGGCAAGCCCCCTTCC[C/T]TTCTCACTCTCTCATCCTGAGCTTCCTGTG<br>TGCAGACGACATTTTAAGAAATGAGCGGGGAGGAGATCTATA                    |
| rs17227369  | ATAGGTACCAAGAAATGAGCGGGGAGGGGAATCACTTCTTGAAATAACCACTGAACAACTCTGTATAGGCA[C/T]TGACTGCTGCTCAGACTTTGGAGGACAAC<br>TCAAATGTTCAAGTCTAATGTCGCCCCCTTTCAAGATCTATA                       |
| rs201494641 | ATAGGTACCTCTTTGTCATTTCCCTTTCTAATTATCAGGGCTGTCCATTATCTGTTCAAGTCTCCCATCTGTCCA[TTTTTTTTTT/TTTTTTTT]CAAAGCCACAGGG<br>TACATTTTGCATTTACTTCTGTTGCTCTGTTCCCTGATTTTTTTTAAAGTGAGATCTATA |
| rs17227404  | ATAGGTACCACACACATGCAGAAAAAGGTATAAATCATCAATGTATACCTCAATAAATTTTCATTAGGTGAA[C/T]GTCCTCAGAATAACATTTTCACACCCCAGCA<br>GCCCCTTCCAATGCCCTCCTGGCCACTTCCAGATCTATA                       |

Major/minor allele in red within brackets
